# Supplementary material for: The Upregulation of Molecules Related to Tumor Immune Escape in Human Pituitary Adenomas
Source: Front Endocrinol (Lausanne). 2021 Oct 21;12:726448. doi: 10.3389/fendo.2021.726448 (PMC8566912; doi:10.3389/fendo.2021.726448)
Supplement: Supplementary file 1 [file Table_1.xlsx]

## Sheet: Sheet1
	Diagnosis	TSS	Radiation	Sex	Max tumor size	Ki67	Invasive	Residual	PD-1	PD-L1	PD-L2	CLTA-4	CD80	CD86
NORMAL PITUITARY
									0.9542	0.9154	0.9384	0.9353	0.9574	0.9678
									0.9692	0.9567	0.9692	0.9466	0.9612	0.9699
									0.9895	0.9778	0.9897	0.9689	0.9813	0.9788
									0.9937	0.9934	0.9954	0.9821	0.9885	0.9821
									0.9958	0.9973	0.9972	0.9886	0.9923	0.9854
									1	1	1	1	1	1
									1	1	1	1	1	1
									1.0063	1.0024	1.0117	1.0086	1.0012	1.0087
									1.0063	1.0045	1.0186	1.0544	1.0088	1.0459
									1.0072	1.0112	1.0993	1.1257	1.0729	1.0782
									1.2233	1.0757	1.2785	1.3435	1.2745	1.2123
									1.4266	1.1317	1.3243	1.5548	1.3138	1.2289
RECURRENT THRU RADIATION
490	ACTH	1	1	M	2	7.1	Y	Y	2.23	10.44	10.44	3.34	3.37	8.87
766	NFT	3	1	M	2.4	2.4	Y	Y	0.44	6.64	2.25	8.97	9.77	9.93
794	PRL	3	1	M	3.9	18	Y	Y	1.56	1.77	5.87	0.98	3.14	4.45
GIANT TUMORS
481	NFT	1	1	M	6	0.7	Y	Y	0.88	1.34	8.93	5.88	12.45	4.4
518	NFT	2	0	M	5	1.1	Y	Y	0.76	2.87	3.03	0.26	6.89	18.06
554	NFT	1	1	M	4.5	0.6	Y	Y	0.88	7.4	9.95	1.14	0.88	25.11
624	NFT	2	1	M	4.7	0.8	Y	Y	0.43		2.27	0.52	6.41	1.4
648	NFT	2	1	F	5.3		Y	Y	1.14	4.43	1.76	4.46	2.56	22.38
655	TSH	2	0	M	6.1	0.5	Y	Y	0.83	2.45	4.45	1.19	5.53	2.27
741	NFT	1	1	F	4.6	3.1	Y	Y	0.32	6.46	1.54	1.16	8.49	12.66
791	NFT	2	1	M	4.1	1	N	Y	0.29	2.69	2.24	0.56	0.56	3.28
725	NFT	1	0	F	4	1.5	Y	Y	0.26	0.016	0.37	0.24	0.45	0.26
GIANT GH-SECRETING TUMORS
519	GH	2	0	F	5.2	6	Y	Y	0.51	1.82	12.54	4.17	5.37	13.26
649	GH	1	1	M	4.3	2.8	Y	Y	2.44	10.82	1.24	0.58	1.91	5.9
706	GH	2	0	M	4.3	<1	Y	Y	0.145	1.58	12.04	6.64	2.77	1.63
RECURRENT MACROADENOMAS STABLE FROM RT
531	NFT	2	1	M	unknown	<1	N	N	1.27	12.04	5.84	0.59	1.8	6.14
544	NFT	1	1	M	2.3	2.1	N	N	0.21	34.44	2.67	0.87	0.36	2.2
570	NFT	2	1	F	3.6	2	N	Y	1.45	6.13	8.49	0.74	12.02	11.49
493	NFT	2	1	M	3.3	3.1	Y	Y	1.15	0.037	6.74	1.3	1.56	0.55
512	NFT	1	1	M	2.4	1.3	Y	Y	1.13	15.03	11.22	7.55	18.89	2.45
517	NFT	2	1	M	3.6	1.7	Y	Y	1.11	0.89	17.72	3.23	5.89	3.3
628	NFT	2	3	M	2.2	<1	Y	Y	1.24	0.88	15.77	1.12	7.75	7.78
630	NFT	1	1	M	2.4	1.7	Y	Y	0.67	3.95	3.36	4.42	2.25	0.89
REMNANT MACROADENOMAS STABLE FROM RT
498	NFT	1	1	M	2.6	0.6	N	Y	0.56	1.49	4.45	0.89	4.56	8.87
643	NFT	2	1	M	3.8	1.6	Y	Y	1.2	3.88	17.83	2.14	2.31	24.47
653	NFT	4	1	M	2.9	5	Y	Y	0.3	0.57	2.37	0.16	17.48	1.85
521	NFT	1	1	M	3.4	1.8	Y	Y	1.33	2.25	6.69	6.64	6.67	14.68
718	NFT	1	1	F	2.5	0.9	Y	Y	0.49	0.1	5.69	15.01	0.49	0.34
FUNCTIONING TUMORS STABLE FROM RT
591	ACTH	2	1	F	1.2	7.4	N	N	1.11	7.79	2.24	1.23	8.89	4.34
664	ACTH	1	1	F	3.7	2.2	Y	Y	1.75	18.03	5.95	1.92	6.3	4.29
710	GH	1	1	M	2.7	20.7	Y	Y	0.14	0.093	6.65	0.46	0.98	0.82
INVASIVE MACROADENOMAS
478	NFT	2	0	F	2.1	<1	Y	Y	0.51	10.02	2.26	0.34	0.93	0.96
528	NFT	2	0	M	2.5	3.2	Y	Y	0.35	0.35	6.49	2.16	3.38	1.06
603	NFT	1	0	F	2	1.1	Y	Y	0.59	12.03	8.98	2.58	1.59	4.09
494	NFT	1	0	F	2.6	1.9	Y	Y	0.15	31.37	8.16	0.26	1.38	1.4
RECURRENT MACROADENOMAS
683	NFT	2	0	M	1.4	0.9	N	N	0.58	4.56	4.59	0.55	17.69	20.18
676	Rec NFT	2	0	F	1	0.6	N	N	0.66	2.79	1.22	2.79	1.19	15.54
CONTROL GROUP-- MACROADENOMAS WITH ONLY SURGERY
798	NFT	1	0	F	1.3	1.5	N	N	0.3	0.34	1.38	0.7	0.7	1.33
597	NFT	1	0	F	1.7	2.1	N	N	0.42	9.95	11.9	1.7	25.33	7.51
665	NFT	1	0	M	1.8	1.2	N	N	0.42	0.98	4.89	0.5	2.82	2.47
682	NFT	1	0	M	1.5	0.8	N	N	1.06	8.76	3.15	0.49	1	3.05
733	NFT	1	0	M	1.6	0.8	N	N	0.71	2.6	5.68	0.45	0.9	1.05
549	NFT	1	0	F	1.6	1.1	N	N	2.18	9.19	4.18	2.48	1.91	1.86
557	NFT	1	0	M	1.6	1	N	N	1.06	17.49	11.55	1.48	2.26	1.82
559	NFT	1	0	M	1.8	1.3	N	N	1.58	12.32	7.83	1.63	0.7	0.176
577	NFT	1	0	F	2.2	1	N	N	2.09	27.98	20.94	0.48	3.29	8.37
580	NFT	1	0	M	2	1.4	N	N	0.13	0.45	1.36	1.27	1.67	1.15
765	NFT	1	0	M	2.1	2.6	N	Y	0.069	1.04	3.92	0.36	1.79	0.48
ALSO CONTROL GROUP-- FUNCTIONING TUMORS
668	ACTH	1	0	F	0.7	3.7	N	N	0.44	0.72	2.94	0.62	1.09	0.91
572	ACTH	1	0	F	0.4	2.2	N	N	6.1	0.96	4.43	3.42	5.43	3.37
672	GH	1	0	F	1	2.1	N	N	3.78	1.54	5.89	1.76	1.15	2.01
734	GH	1	0	F	2	0.9	N	N	3.38	13.16	24.52	19.24	2.49	5.81
742	GH	1	0	M	2	2.4	N	N	2.17	7.42	3.19	1.63	8.06	3.13998
730	GH	1	0	M	3	12	Y	N	0.3	0.034	2.14	0.74	0.75	0.84
535	GH	1	0	F	2.5	0.4	Y	Y	0.34	2.34	1.73	22.01	1.34	2.21
548	GH	1	0	M	1	1.1	Y	N	5.45	3.78	1.86	2.55	0.87	0.79
702	GH	2	0	M	3.4	13.3	N	Y	0.43	0.29	5.16	0.44	1.03
453	PRL	1	0	M	2.1	7.2	N	N	0.13	0.28	2.07	0.56	0.69	0.17
460	PRL	1	0	M	2.2	2.9	Y	Y	0.18	1.55	2.26	0.39	0.86	0.64
775	PRL	1	0	F	0.9	4.3	Y	Y	0.89	0.52	3.78	0.95	3.57	2.21
